# Supplementary material for: Turn-On Fluorescence Aptasensor on Magnetic Nanobeads for Aflatoxin M1 Detection Based on an Exonuclease III-Assisted Signal Amplification Strategy
Source: MDPI journal article supplement (doi:10.3390/nano9010104), 2019-01-16
Supplement: s1 [file s1]

# Turn-On Fluorescence Aptasensor on Magnetic Nanobeads for Aflatoxin M1 Detection Based on an Exonuclease III-Assisted Signal Amplification Strategy

Fuyuan Zhang<sup>1,2,3,†</sup>, Linyang Liu<sup>2,†</sup>, Shengnan Ni<sup>4</sup>, Jiankang Deng<sup>3</sup>, Guo-Jun Liu<sup>5,6</sup>, Ryan Middleton<sup>5,6</sup>, David W. Inglis<sup>1</sup>, Shuo Wang<sup>3,7</sup> and Guozhen Liu<sup>1,2,4,\*</sup>

<sup>1</sup> ARC Centre of Excellence in Nanoscale Biophotonics (CNBP), Macquarie University, North Ryde 2109, NSW, Australia; fuyuan.zhang@aliyun.com (F.Z.); david.inglis@mq.edu.au (D.W.I.)

<sup>2</sup> Graduate School of Biomedical Engineering, Faculty of Engineering, University of New South Wales, Sydney 2052, NSW, Australia; linyang.liu@unsw.edu.au

<sup>3</sup> State Key Laboratory of Food Nutrition and Safety, Key Laboratory of Food Nutrition and Safety, Ministry of Education of China, Tianjin University of Science and Technology, Tianjin 300457, China; dengjk1989@163.com (J.D.); s.wang@tust.edu.cn (S.W.)

<sup>4</sup> International Joint Research Center for Intelligent Biosensor Technology and Health, College of Chemistry, Central China Normal University, Wuhan 430079, China; 15527604959@163.com

<sup>5</sup> Australian Nuclear Science and Technology Organization, Lucas Heights, NSW 2234, Australia; gdl@ansto.gov.au (G.-J.L.); rym@ansto.gov.au (R.M.)

<sup>6</sup> Discipline of Medical Imaging & Radiation Sciences, Faculty of Medicine and Health, Brain and Mind Centre, University of Sydney, 94 Mallett Street, Camperdown, NSW 2050, Australia

<sup>7</sup> Tianjin Key Laboratory of Food Science and Health, School of Medicine, Nankai University, Tianjin 300071, China

\* Correspondence: guozhen.liu@unsw.edu.au

† These authors contributed equally to this work.

## Conjugation of Magnetic beads to the Biotinylated Aptamers.

To test the capability of the magnetic beads, an excess of aptamers (50  $\mu\text{L}$ , 5  $\mu\text{M}$ ) was added to 50  $\mu\text{L}$  1 mg  $\text{mL}^{-1}$  of streptavidin-coated magnetic beads. The conjugation reaction was carried out under gentle mixing for 30 min. The captured aptamers were separated together with the magnetic beads in a magnetic field. The concentration of free aptamers left in the solution were measured with the NanoDrop, which showed a concentration of 1.6  $\mu\text{M}$  in the solution. It indicated that 0.9  $\mu\text{M}$  of aptamers were captured by 1 mg/mL of magnetic beads. Subsequently, the resultant magnetic beads were added to 30  $\mu\text{L}$  4.7  $\mu\text{M}$  of C-strand DNA solution. After a gentle mixing for 30 min, 2.3  $\mu\text{M}$  of C-strand were detected in the left solution, which showed 2.4  $\mu\text{M}$  of aptamer/C duplex were formed onto 1 mg/mL of magnetic nanobeads.

**Table S1.** The DNA sequences used in the experiments.

| DNAs     | Sequences                                   |
|----------|---------------------------------------------|
| Aptamer  | 5'-ACTGCTAGAGATTTTCCACAT-C6-biotin-3'       |
| C-strand | 5'-CAAACCTCTCTATCAGTGG-3'                   |
| T-strand | 5'-AAAACCCAAAACCCAAAACCCACTGATAGAGAGTTTG-3' |
| G-strand | 5'-CTAGCAGAGGGTTTTGGGTTTTGGGTTTTGGGAGCTA-3' |

**Table S2.** The comparisons of the previous fluorescence aptasensors and our aptasensor.

| Developed aptasensors     | Strategy                                                                                                                | Detection range              | LOD                       |
|---------------------------|-------------------------------------------------------------------------------------------------------------------------|------------------------------|---------------------------|
| Guo et al <sup>1</sup>    | A target-induced DNA machine amplification fluorescence assay                                                           | 0.06-0.6 nM                  | 0.01 ng $\text{mL}^{-1}$  |
| Yin et al <sup>2</sup>    | A G-quadruplex-specific fluorescence probe amplification method                                                         | 0.01-2.0 ng $\text{mL}^{-1}$ | 17.79 ng $\text{kg}^{-1}$ |
| Seyyed et al <sup>3</sup> | An electrochemiluminescence (ECL) aptasensor                                                                            | 10-200 ng $\text{mL}^{-1}$   | 0.05 ng $\text{mL}^{-1}$  |
| Atul et al <sup>4</sup>   | A structure-switching signaling aptamer assay based on the FAM-TAMRA quenching-dequenching mechanism                    | 1-2000 ng $\text{kg}^{-1}$   | 5.0 ng $\text{kg}^{-1}$   |
| Our method                | A fluorescence aptasensor based on a magnetic nanomachine and an Exonuclease III-assisted signal amplification strategy | 0.01-2 ng $\text{mL}^{-1}$   | 9.73 ng $\text{kg}^{-1}$  |

## Reference

- Guo, T.; Lin, X.; Liu, Y.; Deng, J.; Qian, P.; Lyu, Y.; Zhang, Z.; Wang, S., Target-induced DNA machine amplification strategy for high sensitive and selective detection of biotoxin. *Sensors and Actuators B: Chemical* **2018**, 262, 619–624.
- Yin, J.; Liu, Y.; Wang, S.; Deng, J.; Lin, X.; Gao, J., Engineering a universal and label-free evaluation method for mycotoxins detection based on strand displacement amplification and G-quadruplex signal amplification. *Sensors and Actuators B: Chemical* **2018**, 256, 573–579.
- Khoshfetrat, S. M.; Bagheri, H.; Mehrgardi, M. A., Visual electrochemiluminescence biosensing of aflatoxin M1 based on luminol-functionalized, silver nanoparticle-decorated graphene oxide. *Biosens Bioelectron* **2018**, 100, 382–388.
- Sharma, A.; Catanante, G.; Hayat, A.; Istamboulie, G.; Ben Rejeb, I.; Bhand, S.; Marty, J. L., Development of structure switching aptamer assay for detection of aflatoxin M1 in milk sample. *Talanta* **2016**, 158, 35–41.
